# Supplementary material
Source: PubMed Central journal article supplement (PMC4607552)
Supplement: NIHMS669736-supplement-01.pdf [file NIHMS669736-supplement-01.pdf]

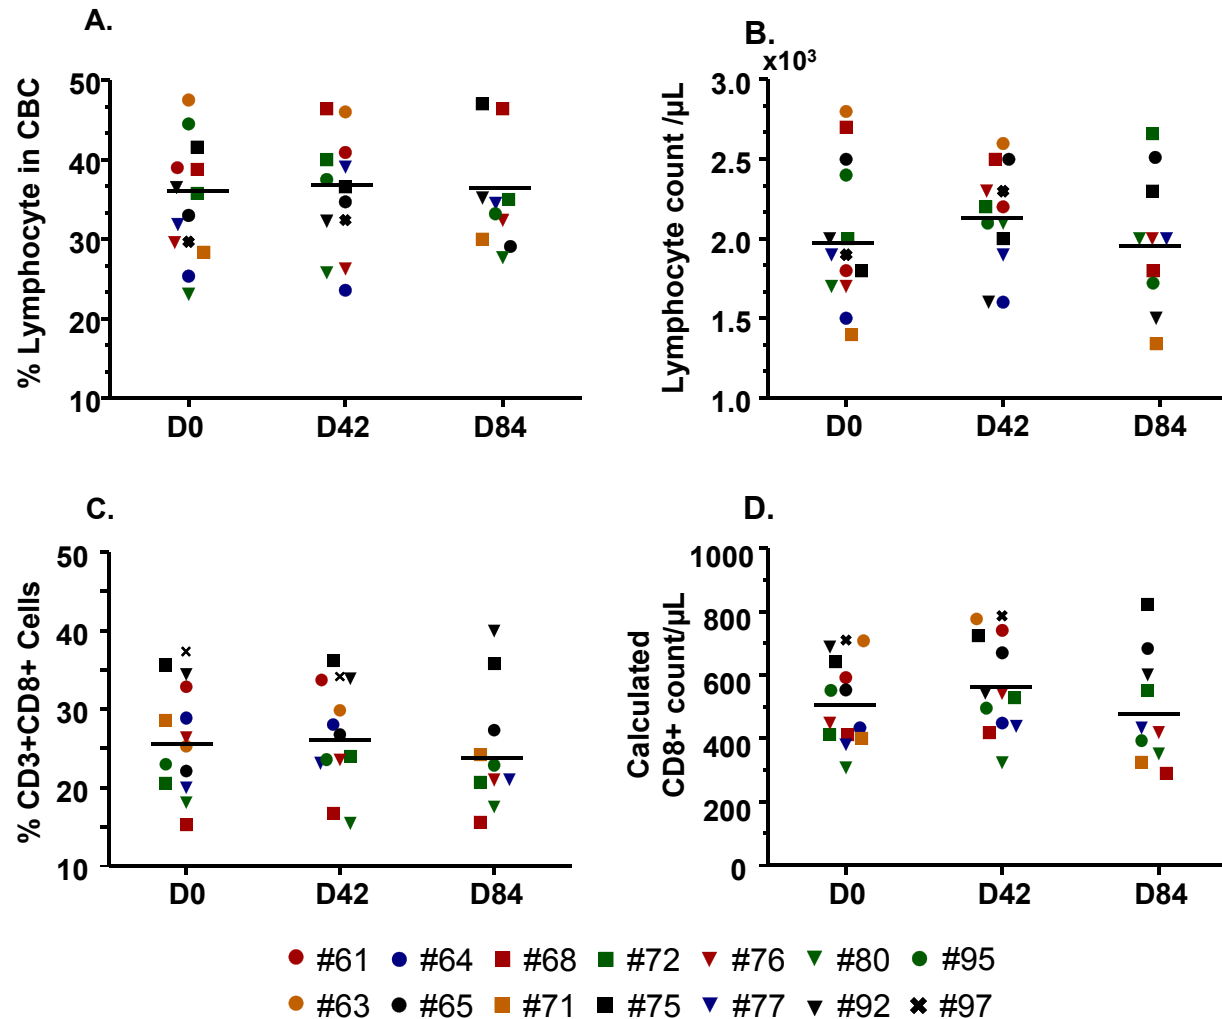

**Figure S1. Blood lymphocyte counts and absolute numbers of CD3+CD8+ cells before and following Ty21a vaccination.** Percentages (**panel A**) and absolute lymphocyte counts/ $\mu\text{L}$  (**panel B**) were obtained from available Complete Blood Cell counts (CBC) performed in blood specimens collected at Days 0 ( $n=14$ ), 42 ( $n=13$ ) and 84 ( $n=10$ ) from Ty21a vaccinated volunteers. The % of CD3+CD8+ cells (**panel C**) were determined by flow cytometry. Absolute numbers of CD8+ cells/ $\mu\text{L}$  (**panel D**) were calculated as:  $[(\text{Absolute counts of lymphocyte}/\mu\text{L}) \times (\% \text{ of CD3+CD8+ cells; by flow cytometry})/100]$

Horizontal bars represent the mean values for each group.

A one way ANOVA with Bonferroni's Multiple Comparison Test showed no significant differences ( $p>0.15$ ) in any of the parameters shown for D0, D42 or D84 samples.

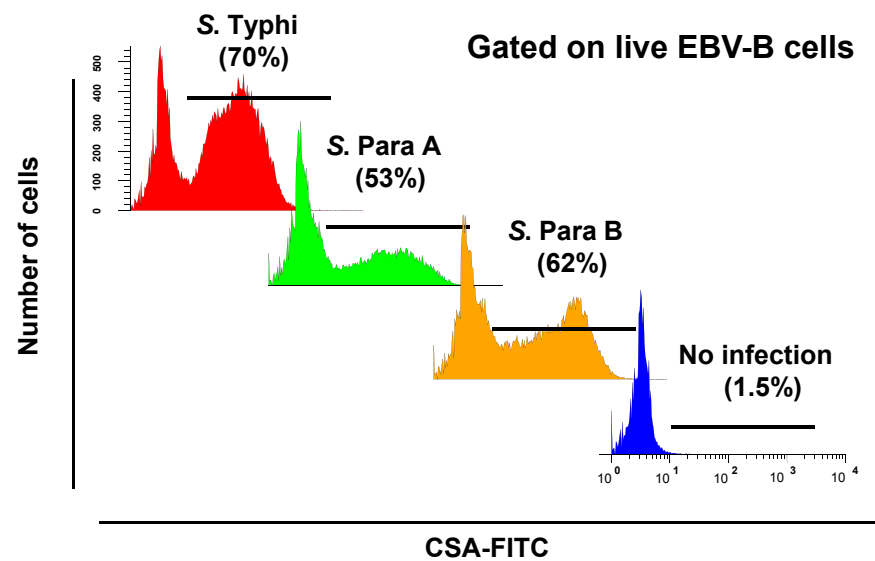

**Figure S2. Preparation of EBV-infected targets.** EBV transformed B Cell lines were infected with *S. Typhi*, *S. Paratyphi* A and *S. Paratyphi* B (MOI: 10:1, Bacteria:Cell) and stained 18 hours post-infection. Percentages of *Salmonella* antigen expressing cells (CSA-1+: solid bar) are shown in parenthesis.

## A. Gating protocol

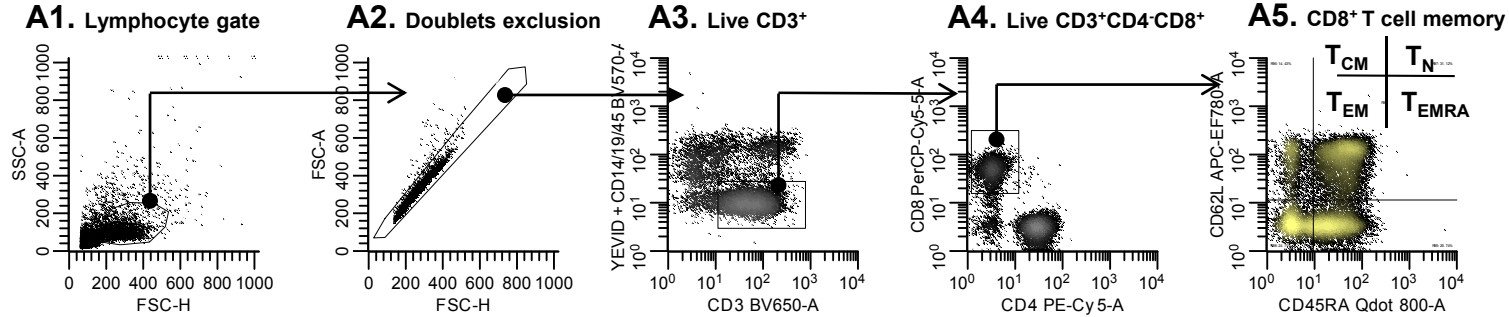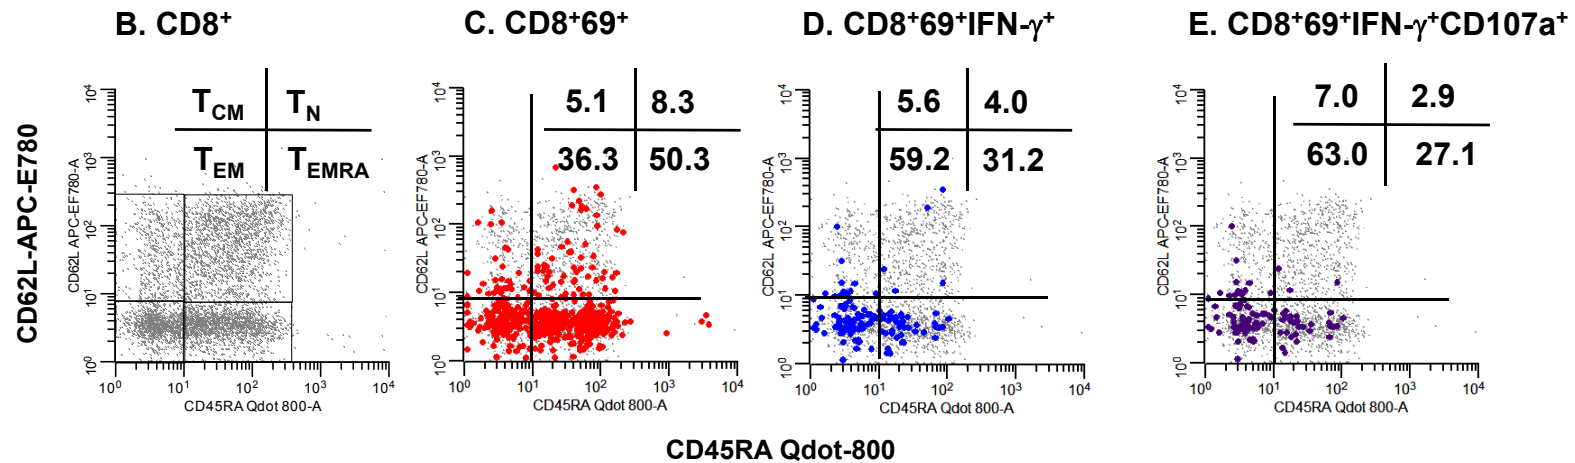

**Figure S3. Gating protocol and characteristics of Ty21a-induced effector CD8<sup>+</sup> T cells.** A sequential gating protocol (**Panels A1-A5**) was used to define memory subsets of CD8<sup>+</sup> T cells, i.e., T central memory ( $T_{CM}$ ; CD62L+CD45RA<sup>-</sup>), T naive ( $T_N$ ; CD62L+CD45RA<sup>+</sup>), T effector memory ( $T_{EM}$ ; CD62L- CD45RA<sup>-</sup>), and CD45RA positive T effector ( $T_{EMRA}$ ; CD62L-CD45RA<sup>+</sup>). PBMC collected from a representative volunteer 42 days following immunization with Ty21a was stimulated with *S. Typhi*-infected targets. Representative histograms show memory T subpopulations (gated on live CD14-CD3+CD4-CD8- depicted in gray dots; **panel B**) on which back-gated cells were superimposed as follows: **panel C** (CD69+ activated cells in red), **panel D** (CD69+ IFN- $\gamma$ + cells in blue) and **panel E** (CD69+IFN- $\gamma$ +CD107a+ cells in purple). The numbers shown in the boxes within histograms (**panels C, D, E**) are the % of the superimposed gated populations into the different T effector and memory subsets (as shown in **panel B**).

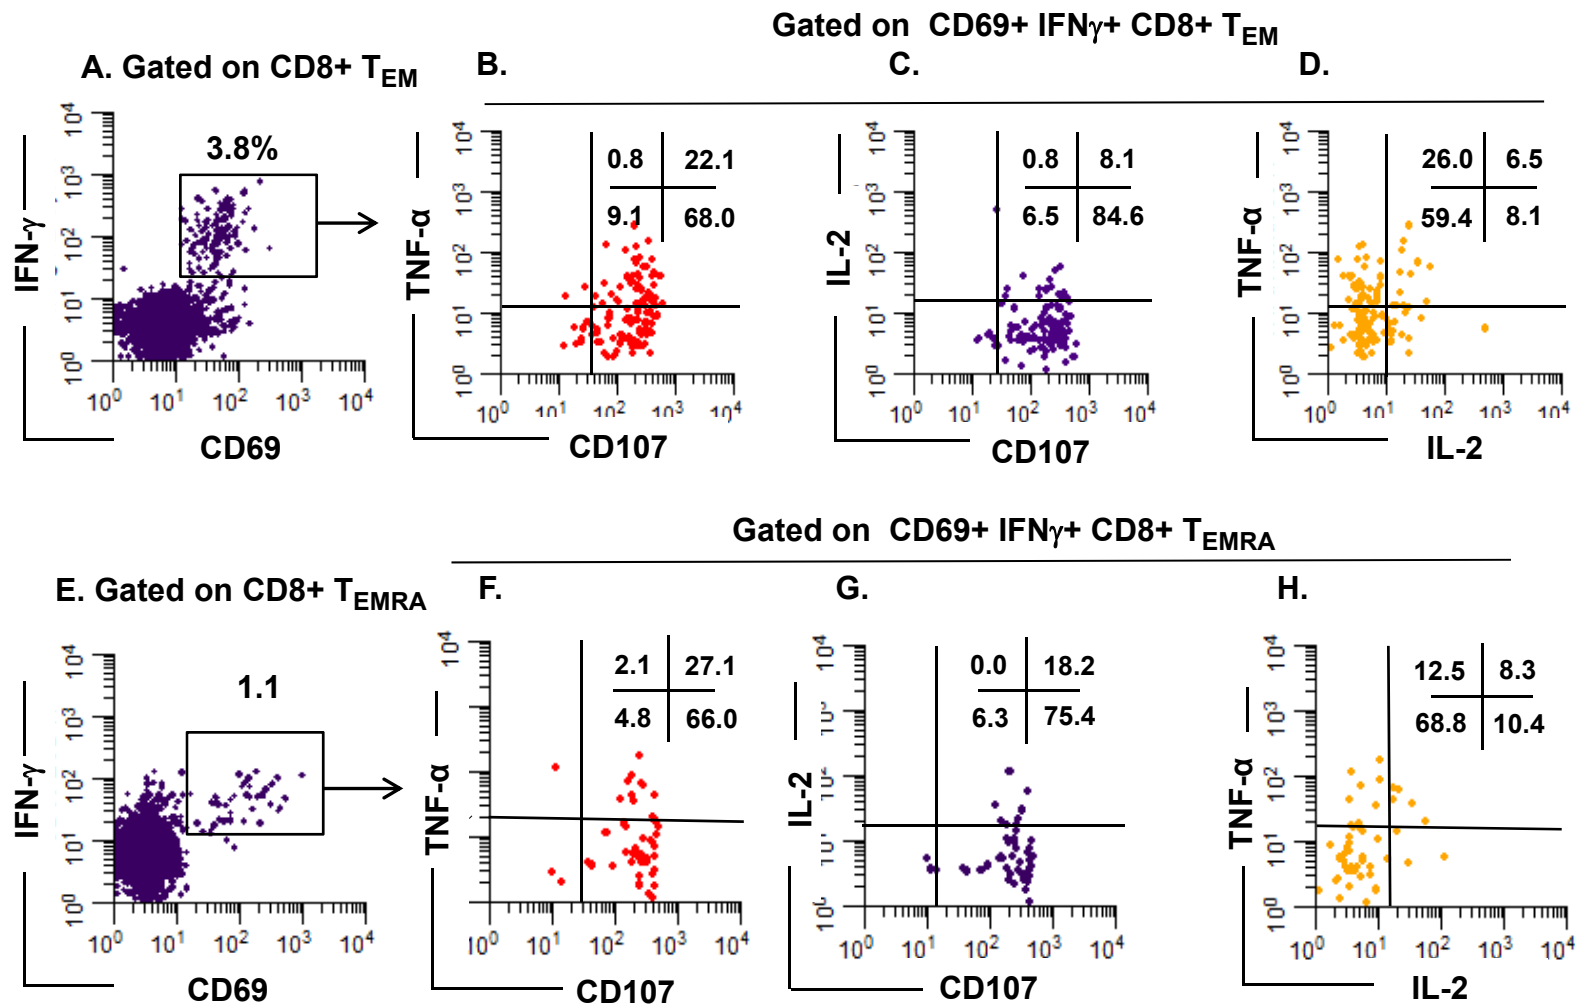

**Figure S4. Representative histograms of multifunctional cells.** PBMC collected from a representative volunteer (#92) 42 days following immunization with Ty21a were stimulated with *S. Typhi*-infected targets. Shown are two parameter histograms of activated (CD69+) IFN- $\gamma$ + cells corresponding to T<sub>EM</sub> (**panel A**) and T<sub>EMRA</sub> (**panel E**) subsets of CD8+ cells (gating protocol is shown in **Fig. S3**). CD8+CD69+IFN $\gamma$ + cells in T<sub>EM</sub> (**panels B,C,D**) and T<sub>EMRA</sub> subsets (**panels F,G,H**) were further analyzed regarding their co-production of TNF- $\alpha$ , CD107, or IL-2. The numbers shown within histograms represent the % of gated subsets in the corresponding quadrant.

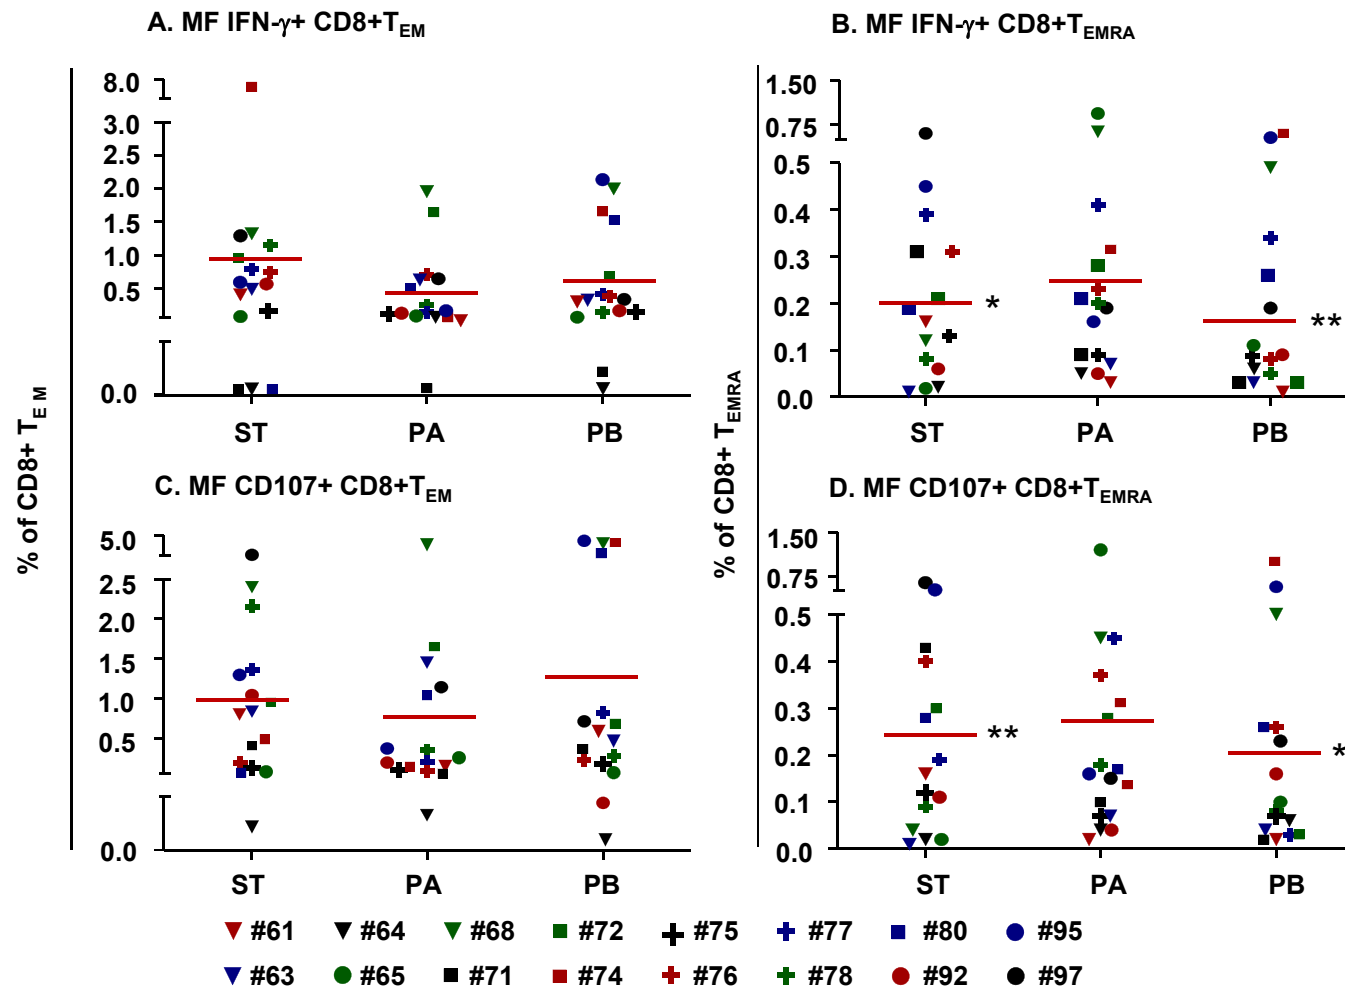

**Figure S5. Post-vaccination peak increases in *Salmonella*-specific cross-reactive multifunctional cells in individual Ty21a vaccinees:** Shown are the peak post-vaccination increases of *S. Typhi* (ST)-, *S. Paratyphi A* (PA)- or *S. Paratyphi B* (PB)-specific IFN- $\gamma$ + (**Panels A,B**) and CD107+ (**Panels C,D**) of total multifunctional (MF, the sum of all multifunctional subsets) cells in CD8+T<sub>EM</sub> (n=16, **panels A, C**) and CD8+T<sub>EMRA</sub> (n=15, **panels B,D**) subsets.

Post-vaccination peaks: Peak responses at days 42 or 84 minus pre-vaccination [day 0] levels

Horizontal bars represent Mean \*\*p<0.01. \*p<0.05 compared to the corresponding T<sub>EM</sub> (in **panels A and C**) by Wilcoxon signed rank test, 2-tail.

ST specific increases in CD8+ T<sub>EMRA</sub> subsets in volunteer #74 were outliers (above mean+3SD) and thus were excluded for this comparative analysis

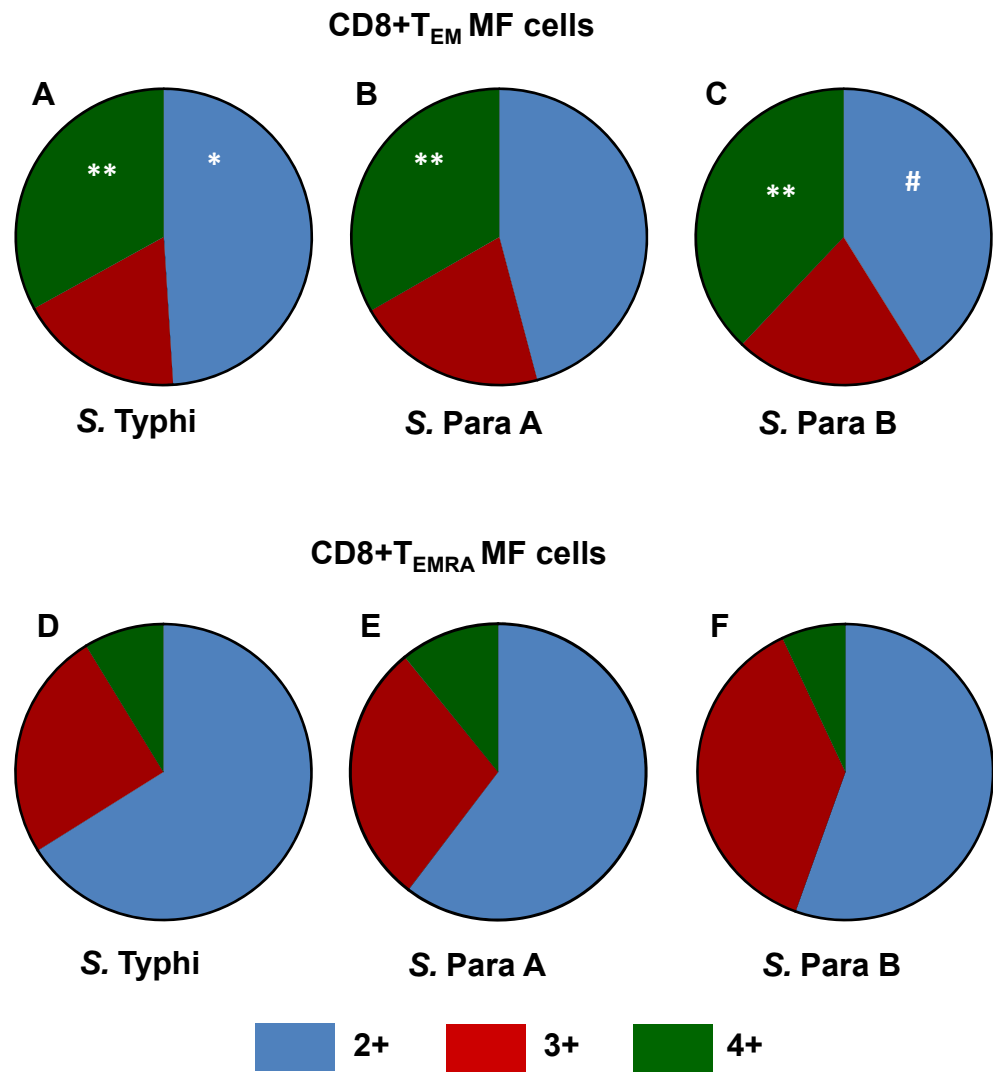

**Figure S6. Characterization of post-vaccination increases in multifunctional responses by CD8+ T<sub>EM</sub> and T<sub>EMRA</sub> subsets.** Post-vaccination peak increases (peak level at days 42 or 84 post-vaccination minus the corresponding pre-vaccination levels) in IFN- $\gamma$ , TNF- $\alpha$  and IL-2 producing and/or CD107a expressing MF subpopulations were determined by FCOM analysis in 16 subjects. CD8+ T<sub>EM</sub> (**panels A,B,C**) and CD8+T<sub>EMRA</sub> (**panels D,E,F**) cells concomitantly producing double (2+), triple (3+) or all (quadruple, 4+) cytokines or expressing CD107 cells are shown as percentages of the corresponding total *Salmonella*-specific MF cells. Data were analyzed by Mann-Whitney tests. Comparisons represent those between CD8+ T<sub>EM</sub> and T<sub>EMRA</sub> subsets. \*p<0.05 \*\*p<0.01. #p=0.06

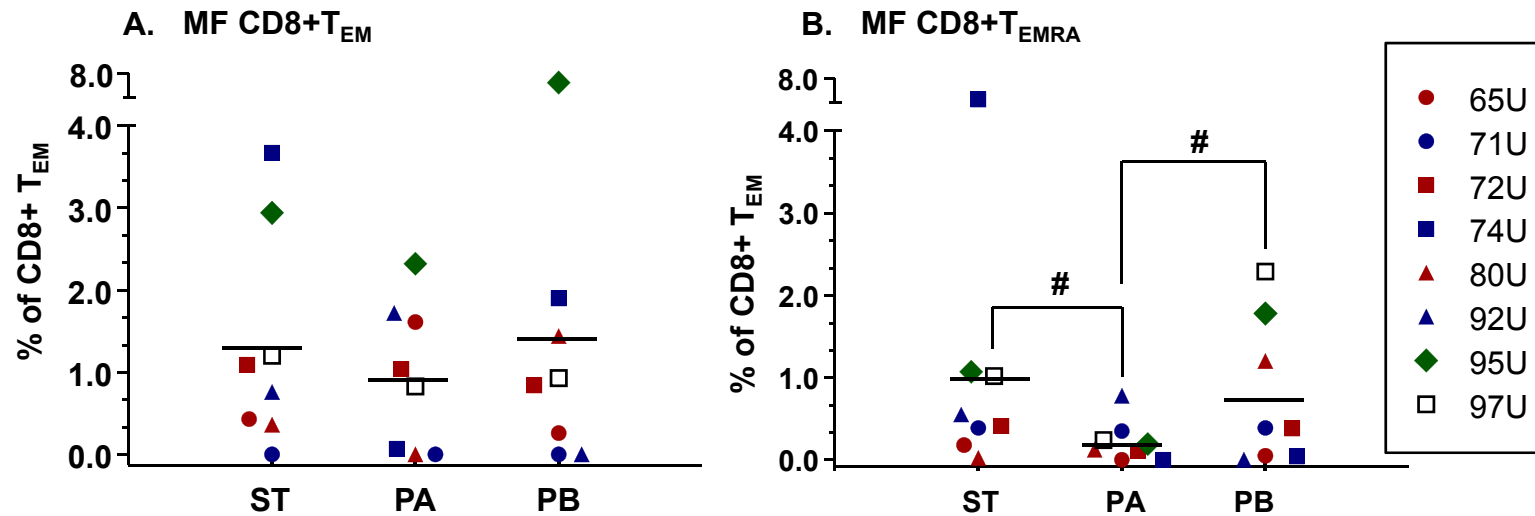

**Figure S7. Post-vaccination increases in MIP-1 $\beta$  producing CD8<sup>+</sup> cells in individual Ty21a vaccinees.** Shown are the post-vaccination peak increases in total multifunctional (MF) MIP-1 $\beta$ <sup>+</sup> cells in CD8+T<sub>EM</sub> (**panel A**) and CD8+T<sub>EMRA</sub> (**panel B**) subsets following stimulation with *S. Typhi* (ST)-, *S. Paratyphi A* (PA)- and *S. Paratyphi B* (PB)-infected targets. Horizontal Bars indicate the means of each group (n=8).

#p=0.12 by Wilcoxon signed rank test, 2-tail.
